# Supplementary material for: Microelectrofluidic probe for sequential cell separation and patterning
Source: Royal Society of Chemistry journal article supplement (doi:10.1039/c9lc00748b), 2019-01-01
Supplement: c9lc00748b1.pdf [file c9lc00748b1.pdf]

## Supplementary Figures

### Microelectrofluidic Probe for Sequential Cell Separation and Patterning

Ayoola T. Brimmo<sup>1,2</sup>, Anoop Menachery<sup>1</sup>, Mohammad A. Qasaimeh<sup>1,2</sup>

<sup>1</sup>Division of Engineering, New York University Abu Dhabi

<sup>2</sup>Department of Mechanical and Aerospace Engineering, New York University, New York

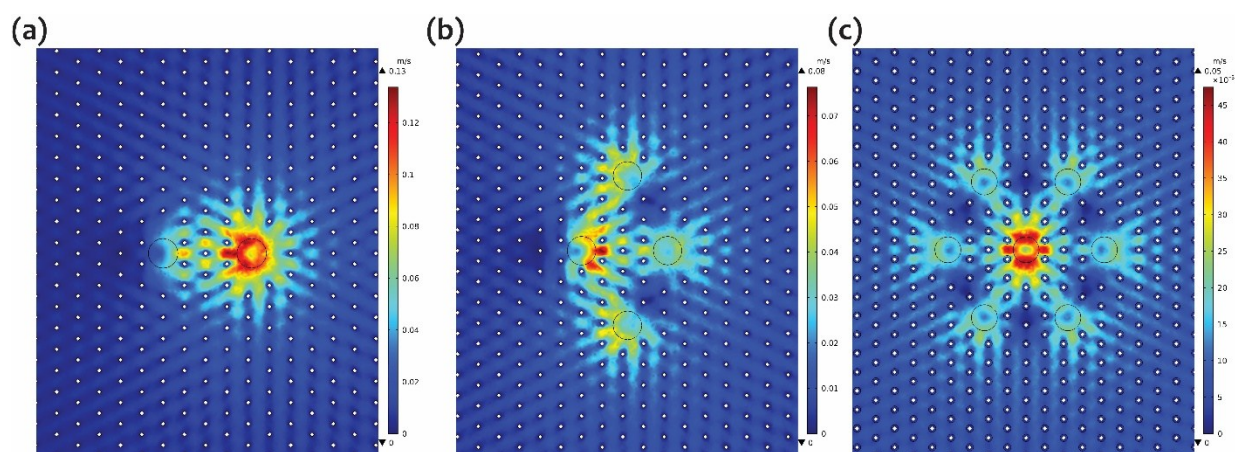

**Fig. S1. Velocity profile at capture plane with 20  $\mu\text{l}/\text{min}$  inlet flow rate.** (a) Dipole Microfluidic configuration. (b) Quadrupole Microfluidic configuration. (c) Heptapole Microfluidic configuration.

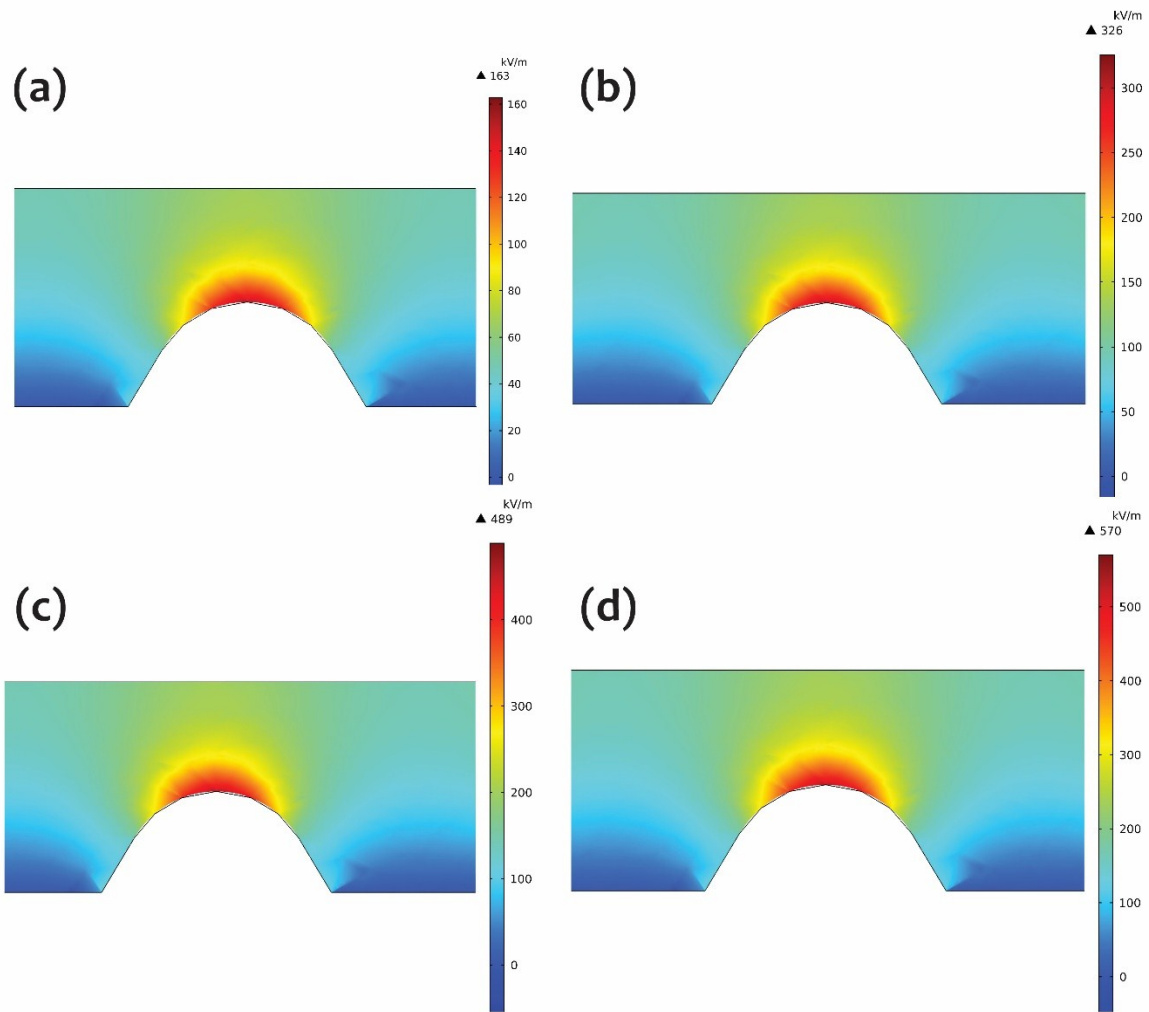

**Fig. S2. Electric field strength as a function applied voltage. (a) 10 Vpk-pk. (b) 20 Vpk-pk. (c) 30V pk-pk. (d) 40 Vpk-pk.**

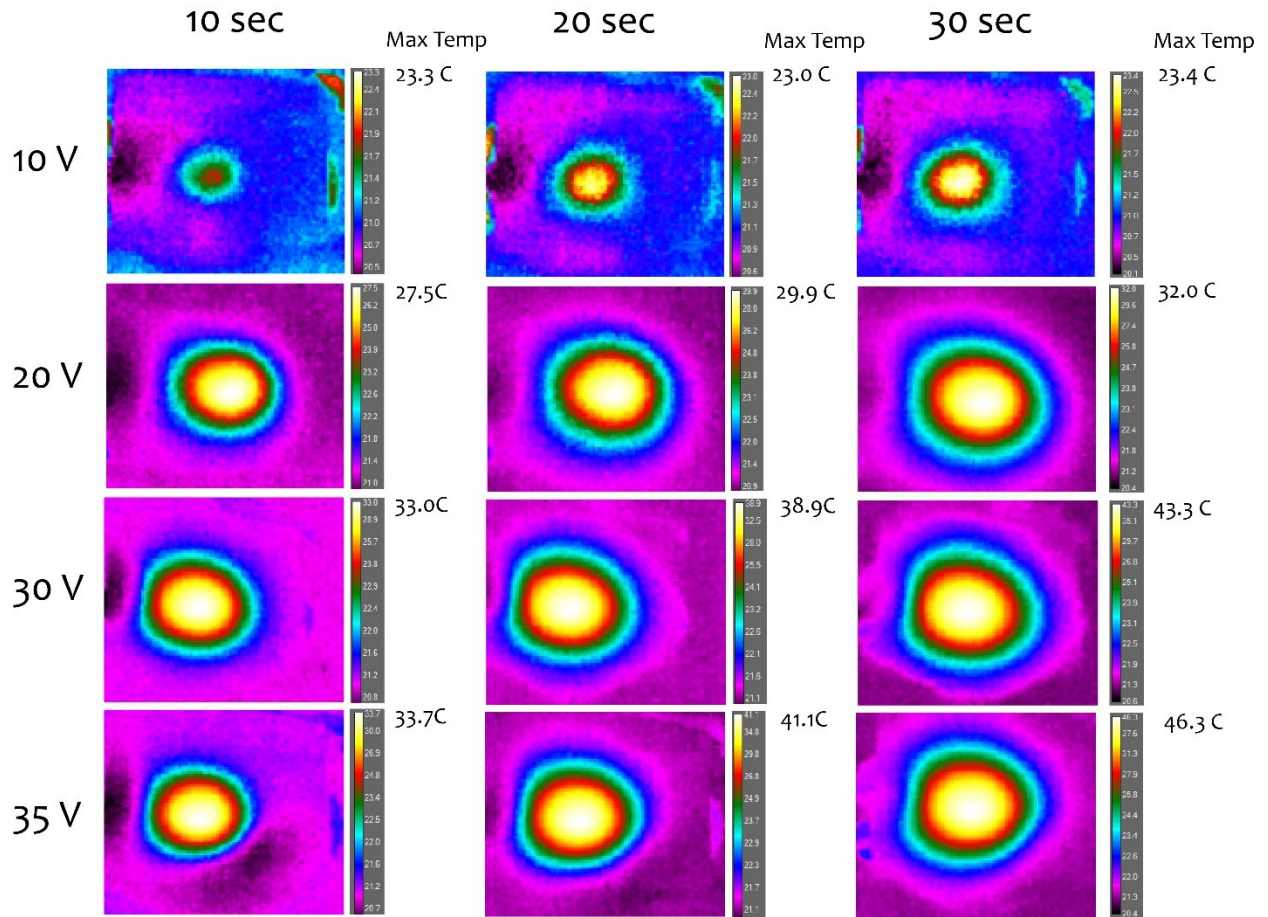

**Fig. S3. Temperature measurements as a function of applied voltage and exposure time.** Transient Infrared images as a function of applied voltage showed that the maximum temperature cells were exposed to at 35 V is 46.3 C

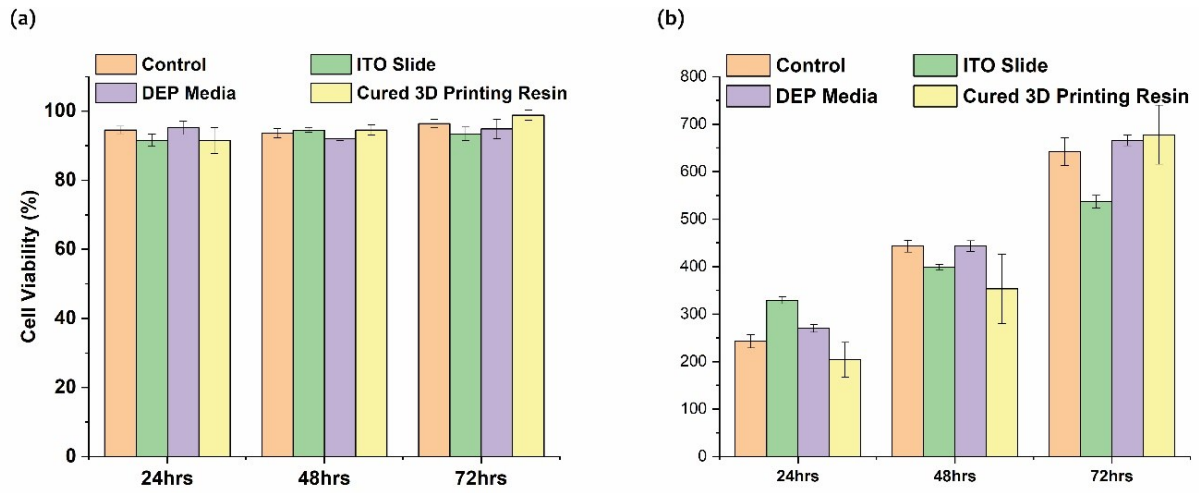

**Fig. S4. Impact of materials on cell viability and growth density.** (a) Cell viability as a function of time for different materials used in the study. (b) Cell density as a function of time for different materials used in the study. Error bars denote standard error.

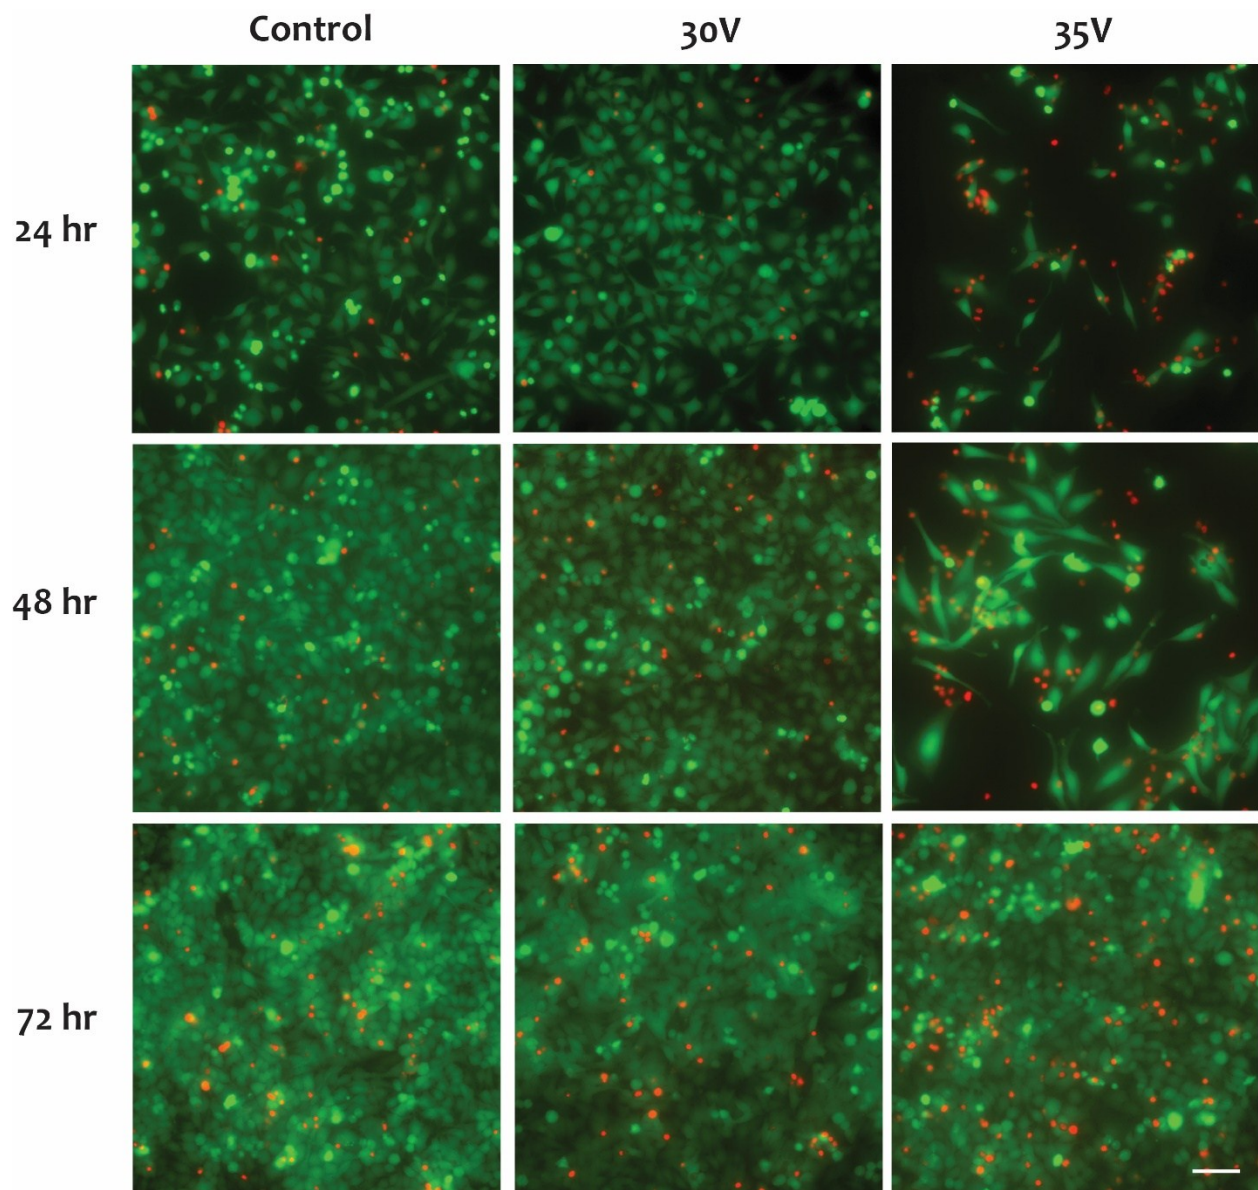

**Fig. S5. Fluorescent image for live/dead viability study.** Green denotes live cells and red denotes dead cells. Scale bar is 100  $\mu\text{m}$ .

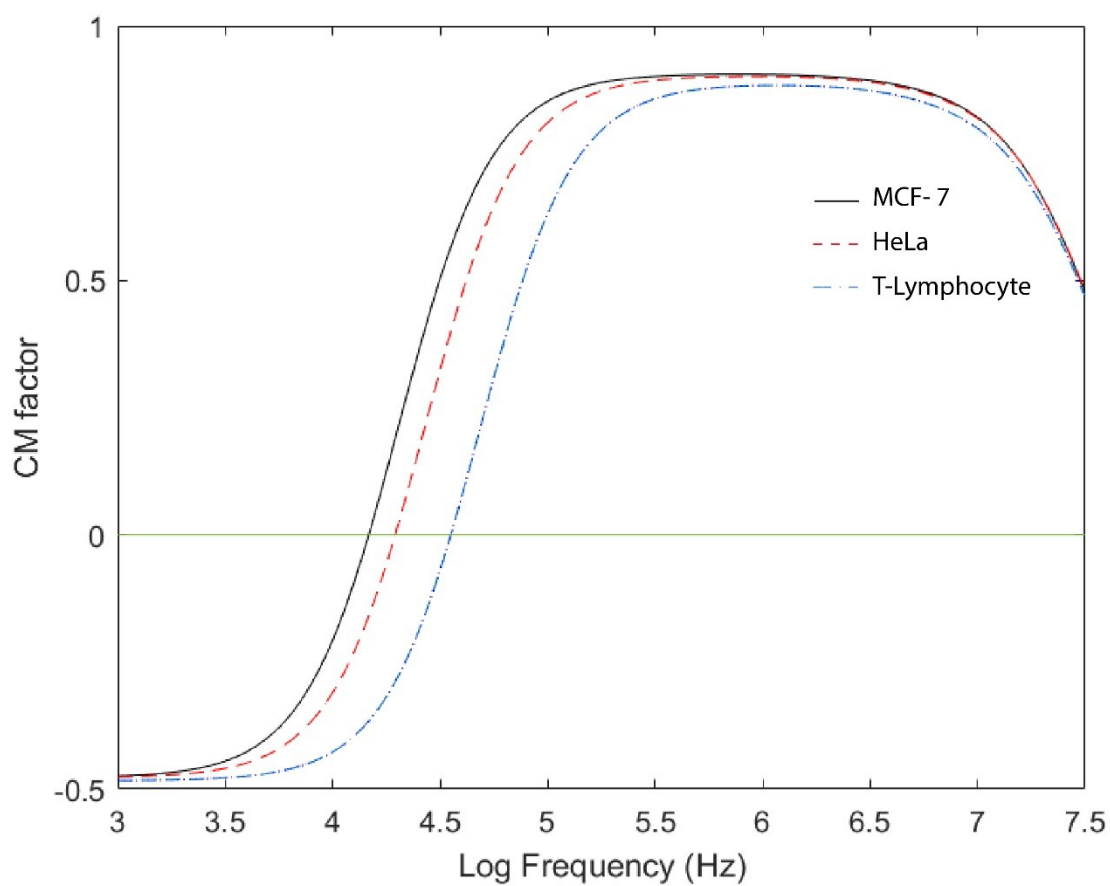

**Fig. S6. Calculated CM function of MCF 7, HeLa, and T-lymphocytes.** Frequency dependent CM-function calculated using the two-shelled model
